# Supplementary material for: Protein-induced fluorescence enhancement of two-photon excitable water-soluble diketopyrrolopyrroles
Source: Royal Society of Chemistry journal article supplement (doi:10.1039/c7ob01397c), 2017-01-01
Supplement: c7ob01397c1.pdf [file c7ob01397c1.pdf]

## ***Protein-induced Fluorescence Enhancement of Two-Photon Excitable Water-Soluble Diketopyrrolopyrroles***

Simon Tang,<sup>1</sup> Ebrahim H. Ghazvini Zadeh,<sup>2</sup> Bosung Kim,<sup>1</sup> Nikia T. Toomey,<sup>1</sup> Mykhailo. V. Bondar,<sup>3</sup> and Kevin D. Belfield<sup>\*4,5</sup>

<sup>1</sup>Department of Chemistry, University of Central Florida, Orlando, FL 32816, USA

<sup>2</sup>Department of Cell Biology, University of Texas, Dallas, TX 75235, USA

<sup>3</sup>Institute of Physics NASU, Prospect Nauki 46, Kiev 28, 03028, Ukraine

<sup>4</sup>Department of Chemistry and Environmental Science, College of Science and Liberal Arts, New Jersey Institute of Technology, University Heights, Newark, NJ 07102, USA

<sup>5</sup>School of Chemistry and Chemical Engineering, Shaanxi Normal University, Xi'an, 710062, PRC

### Supporting Information

- <sup>1</sup>H and <sup>13</sup>C NMR Spectra of **4**, **5**, **DPP1**, and **DPP2**.....2-9
- Photophysical Characterization of **DPP1** and **DPP2**.....10-11

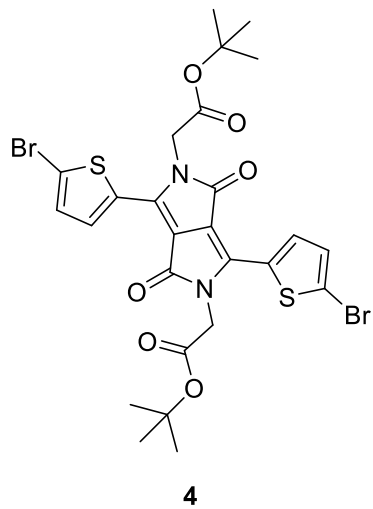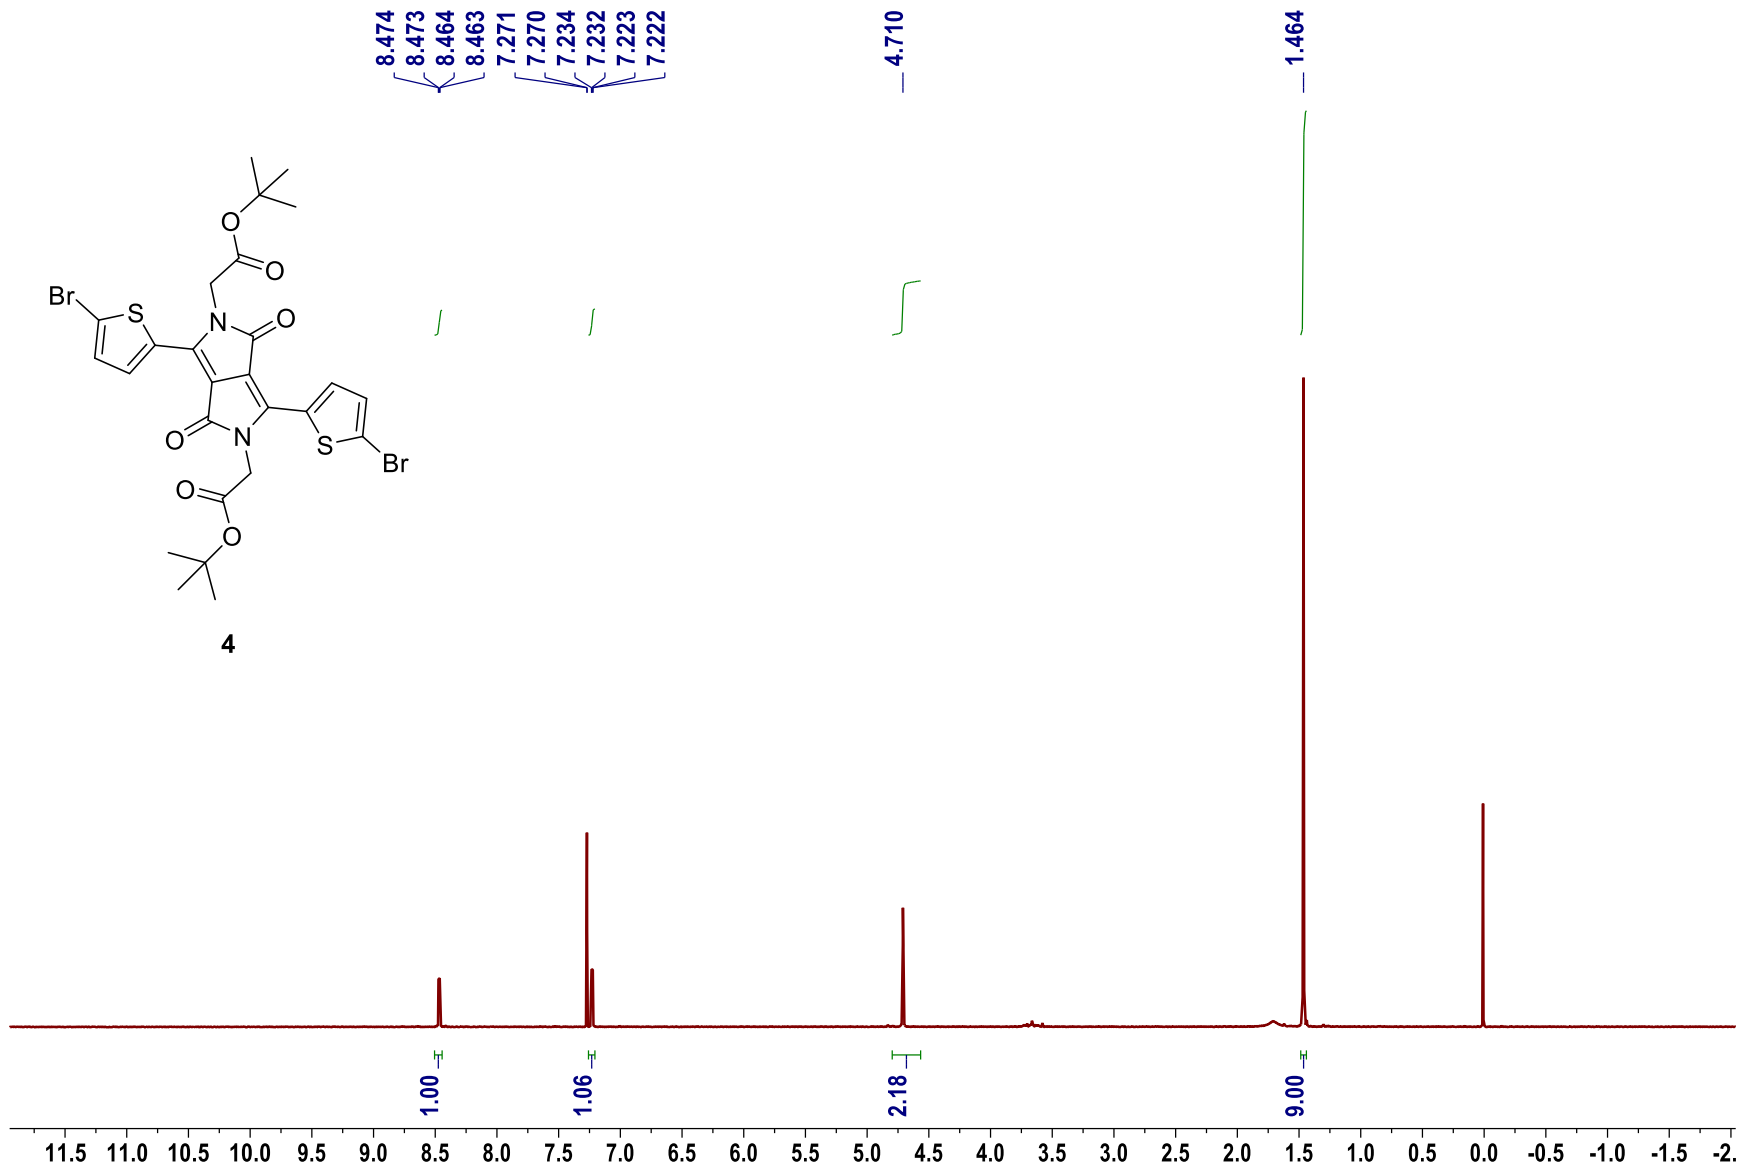

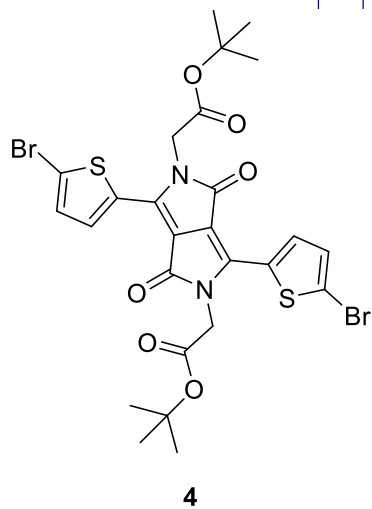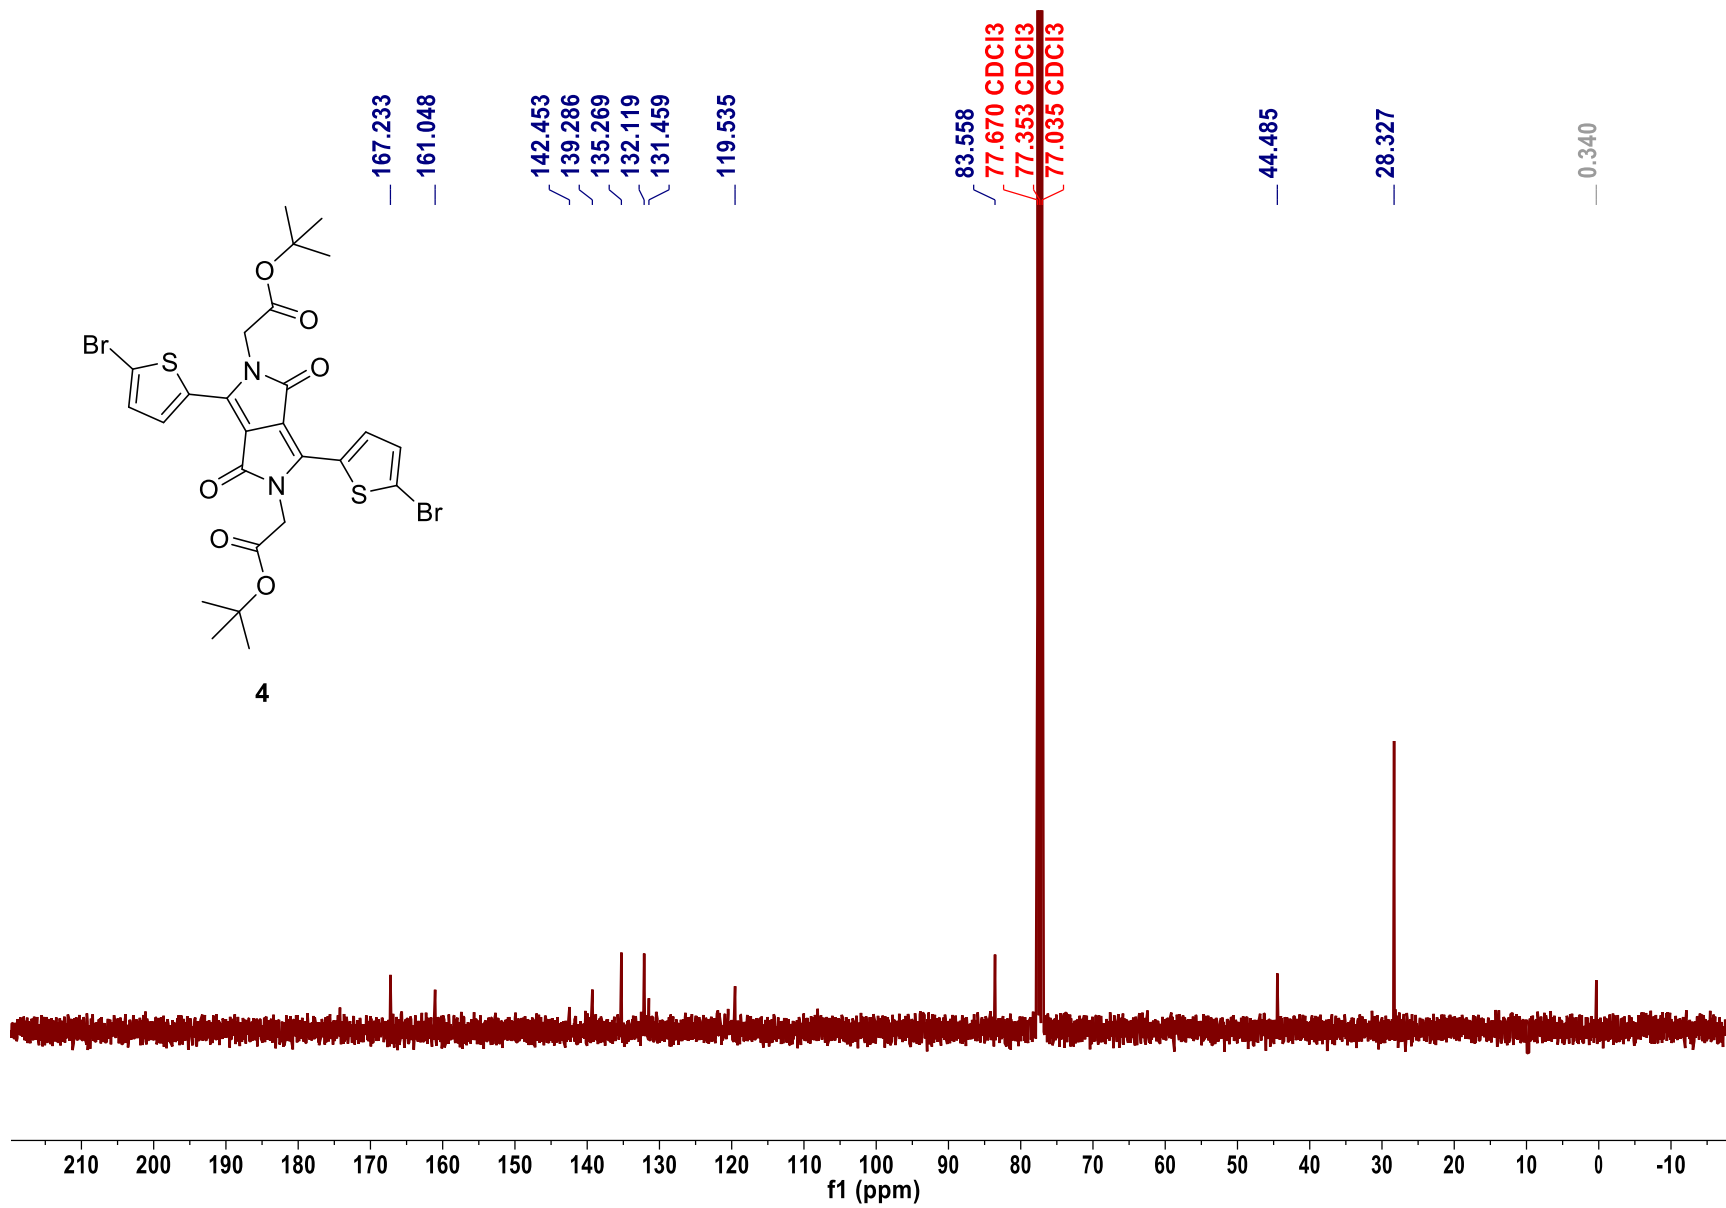

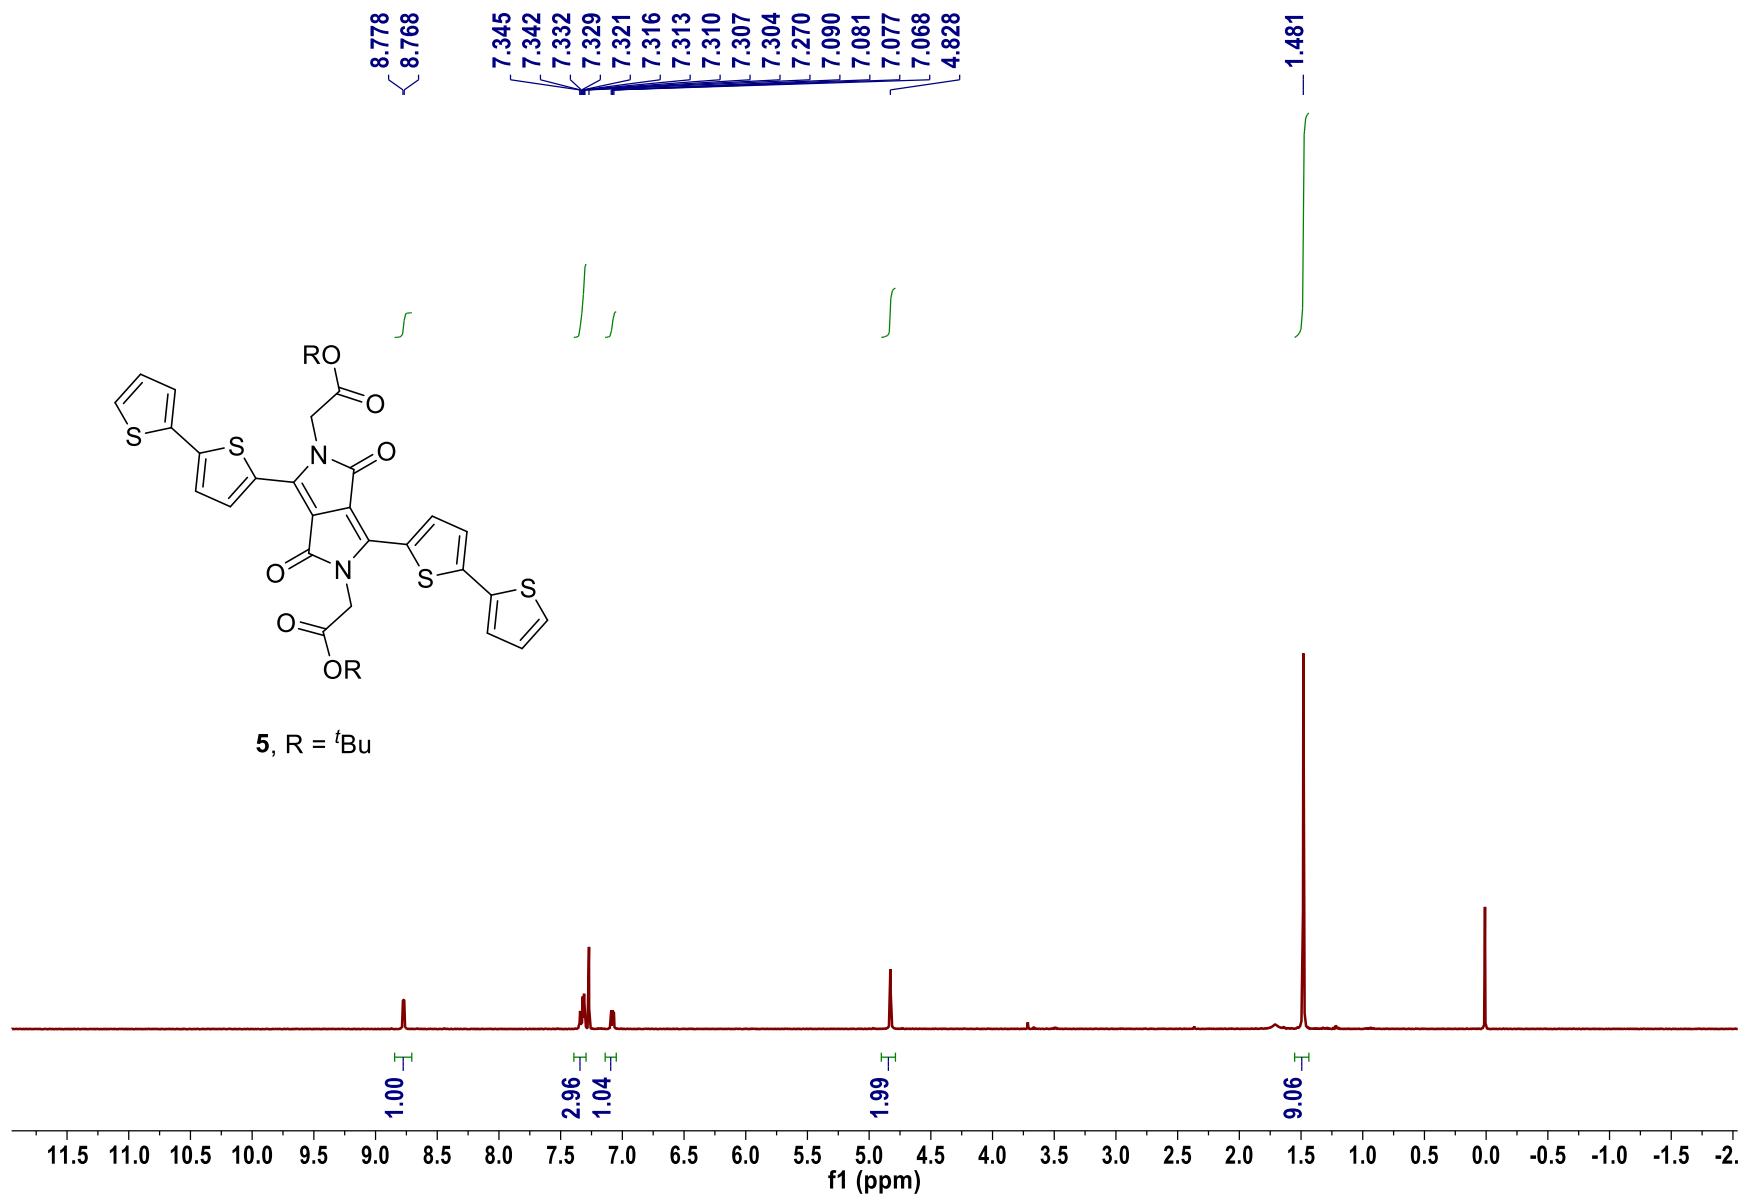



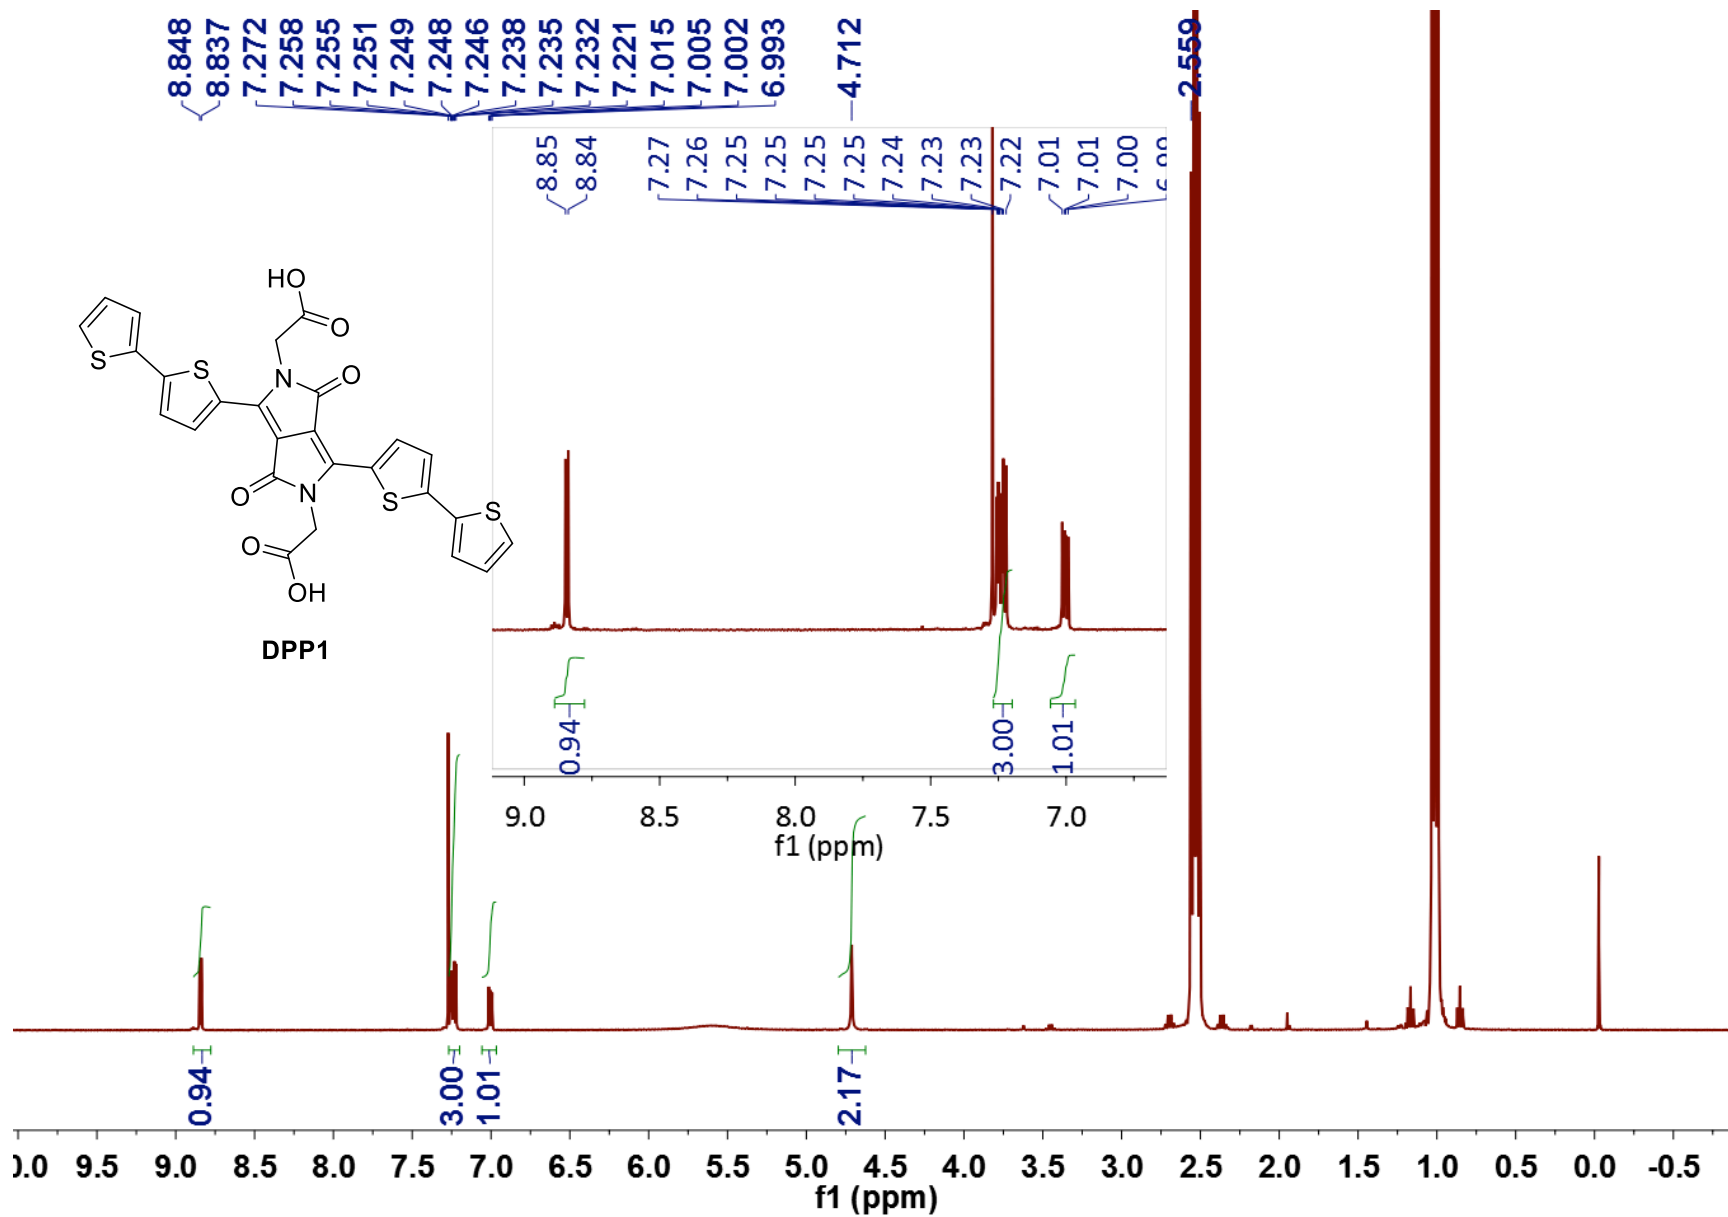

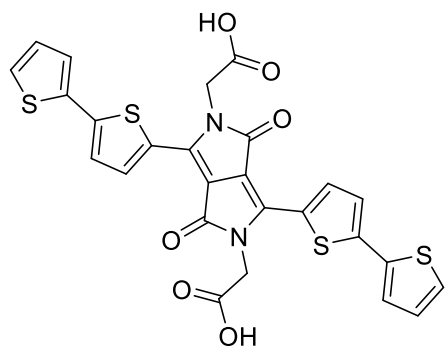

DPP1

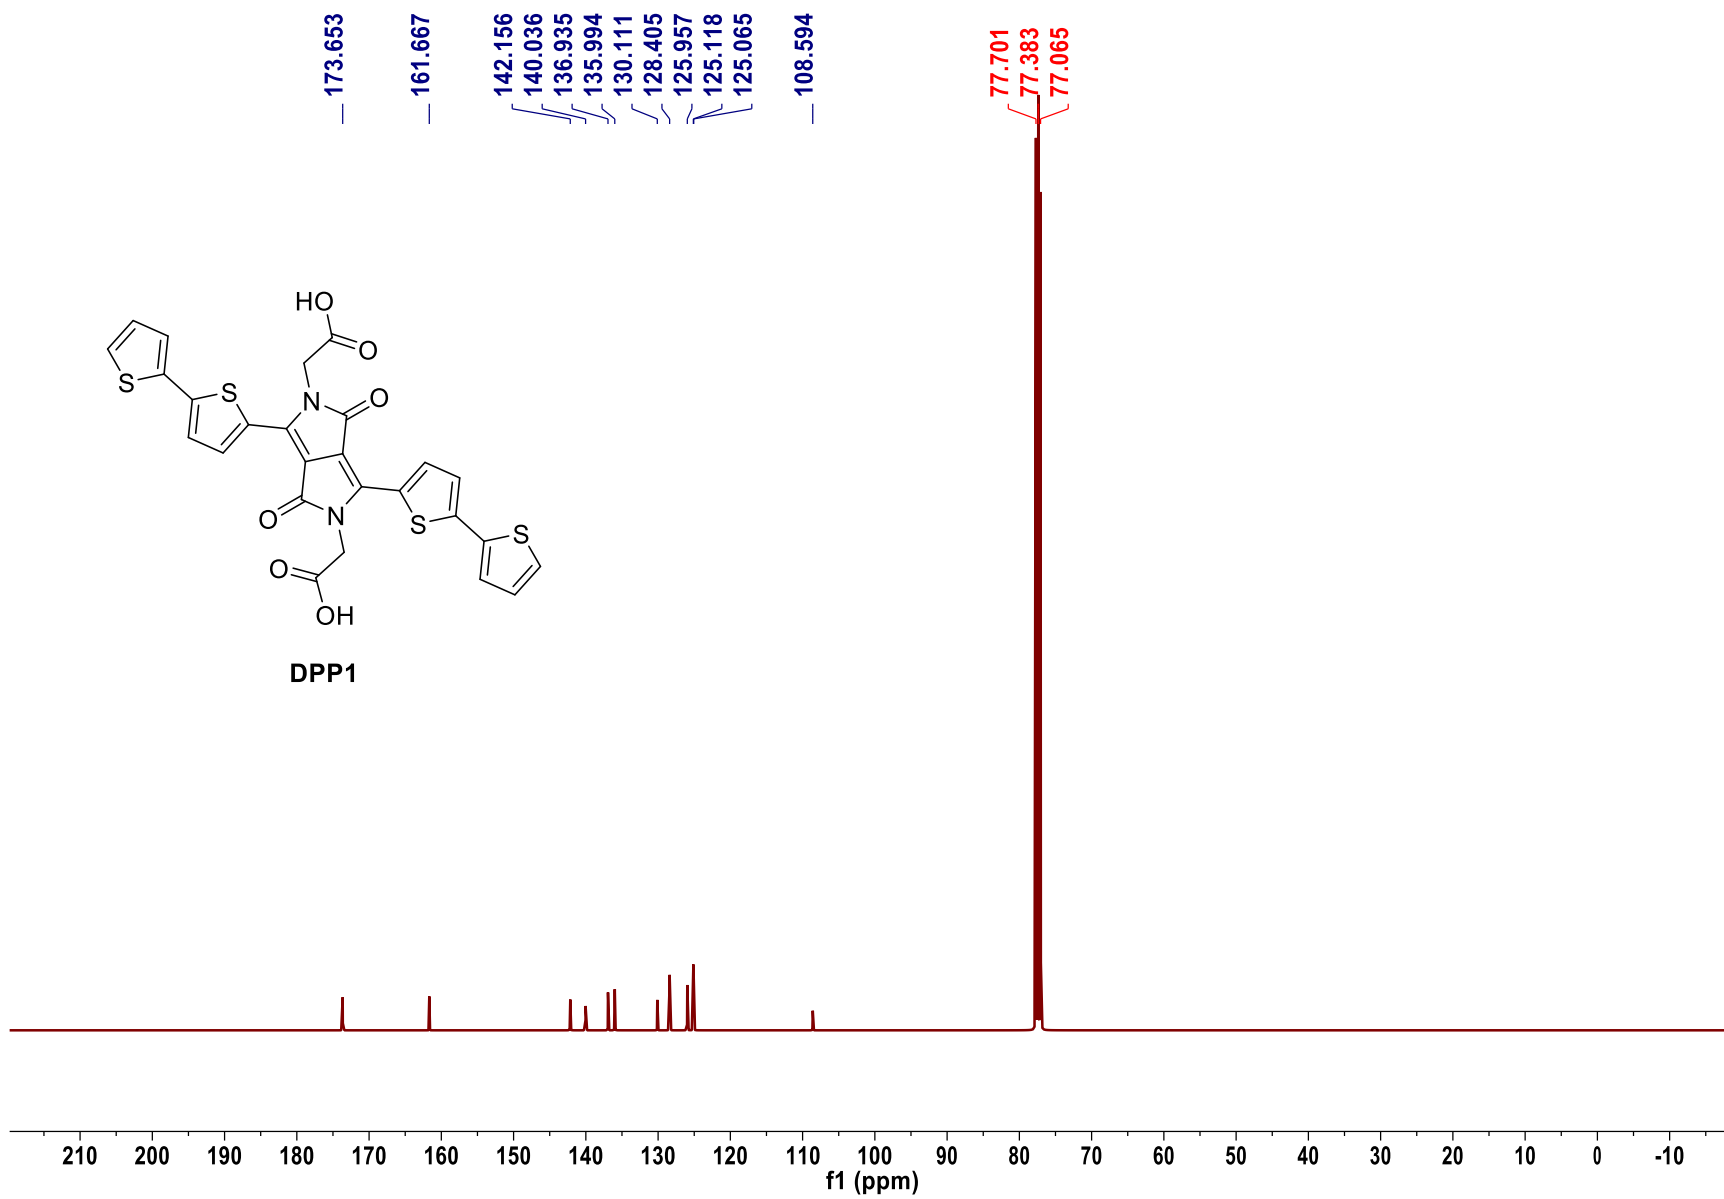

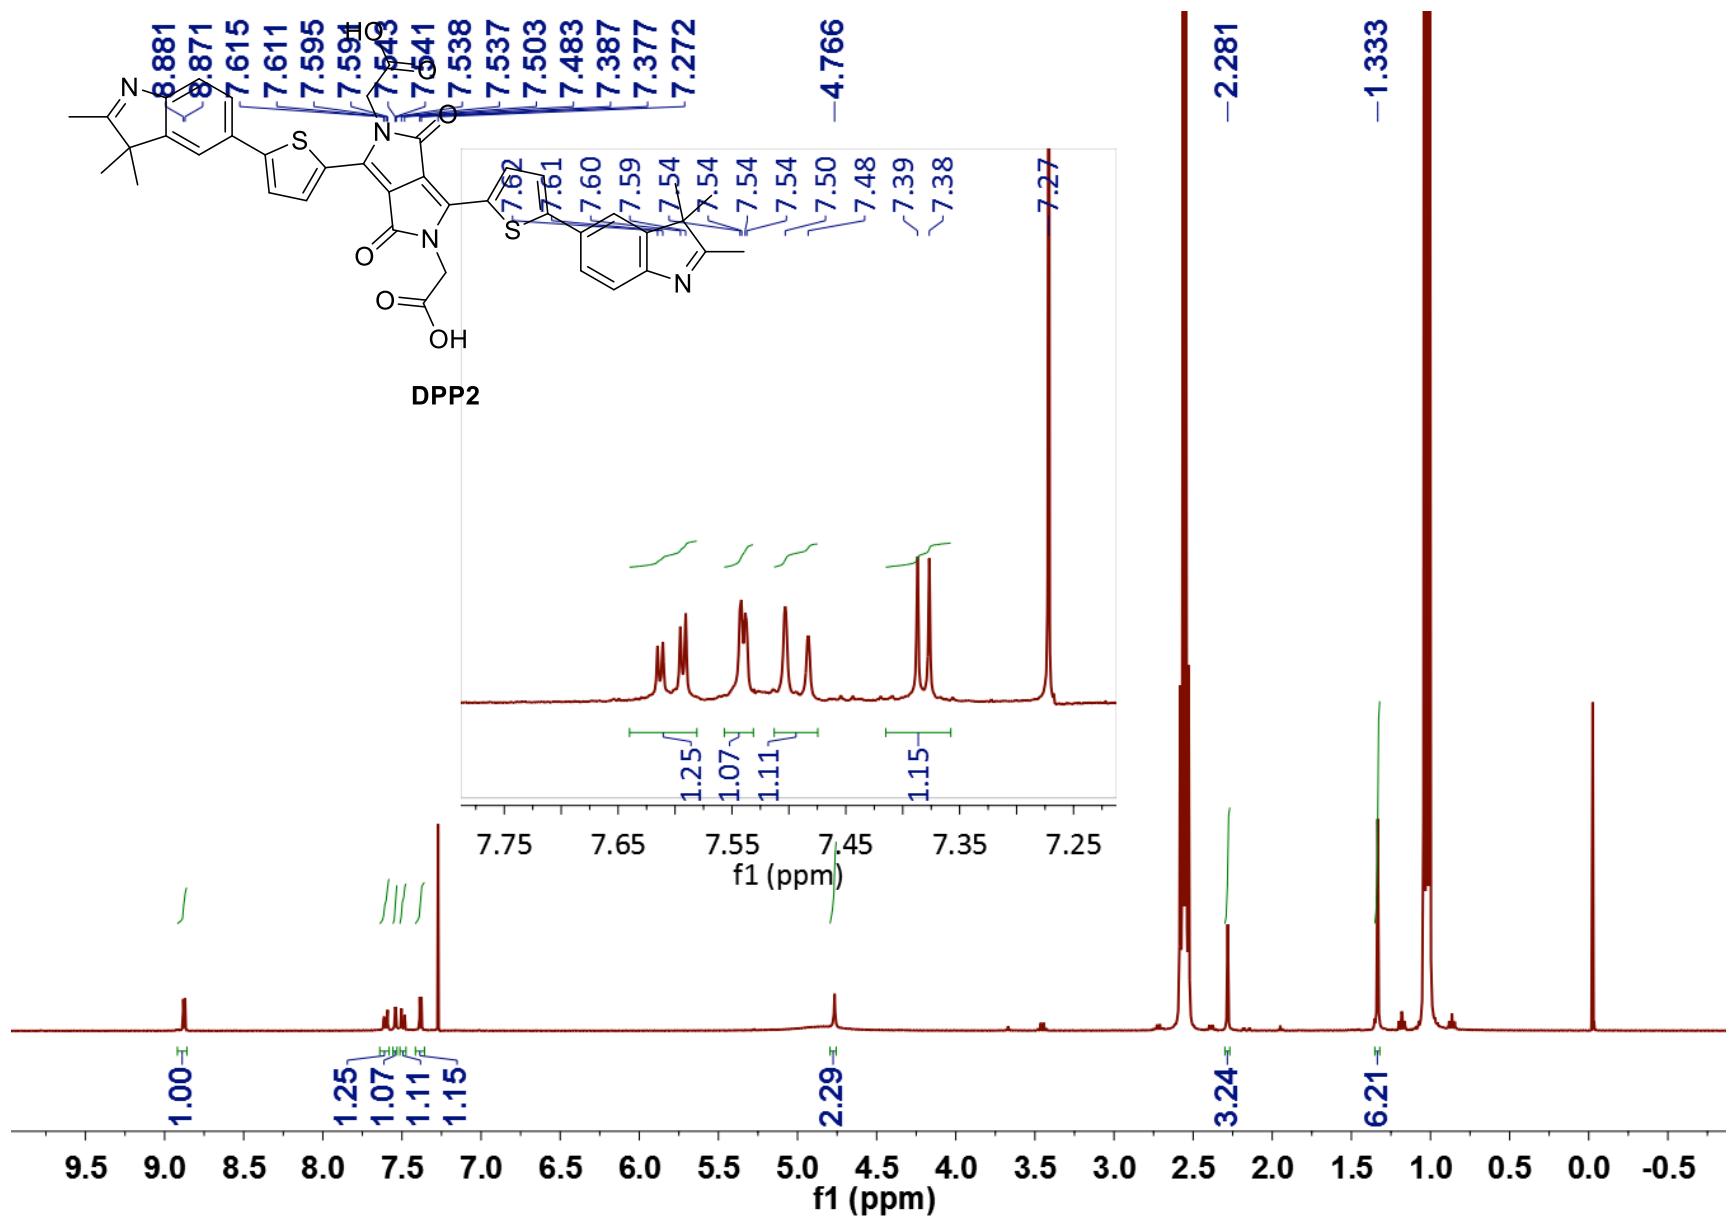



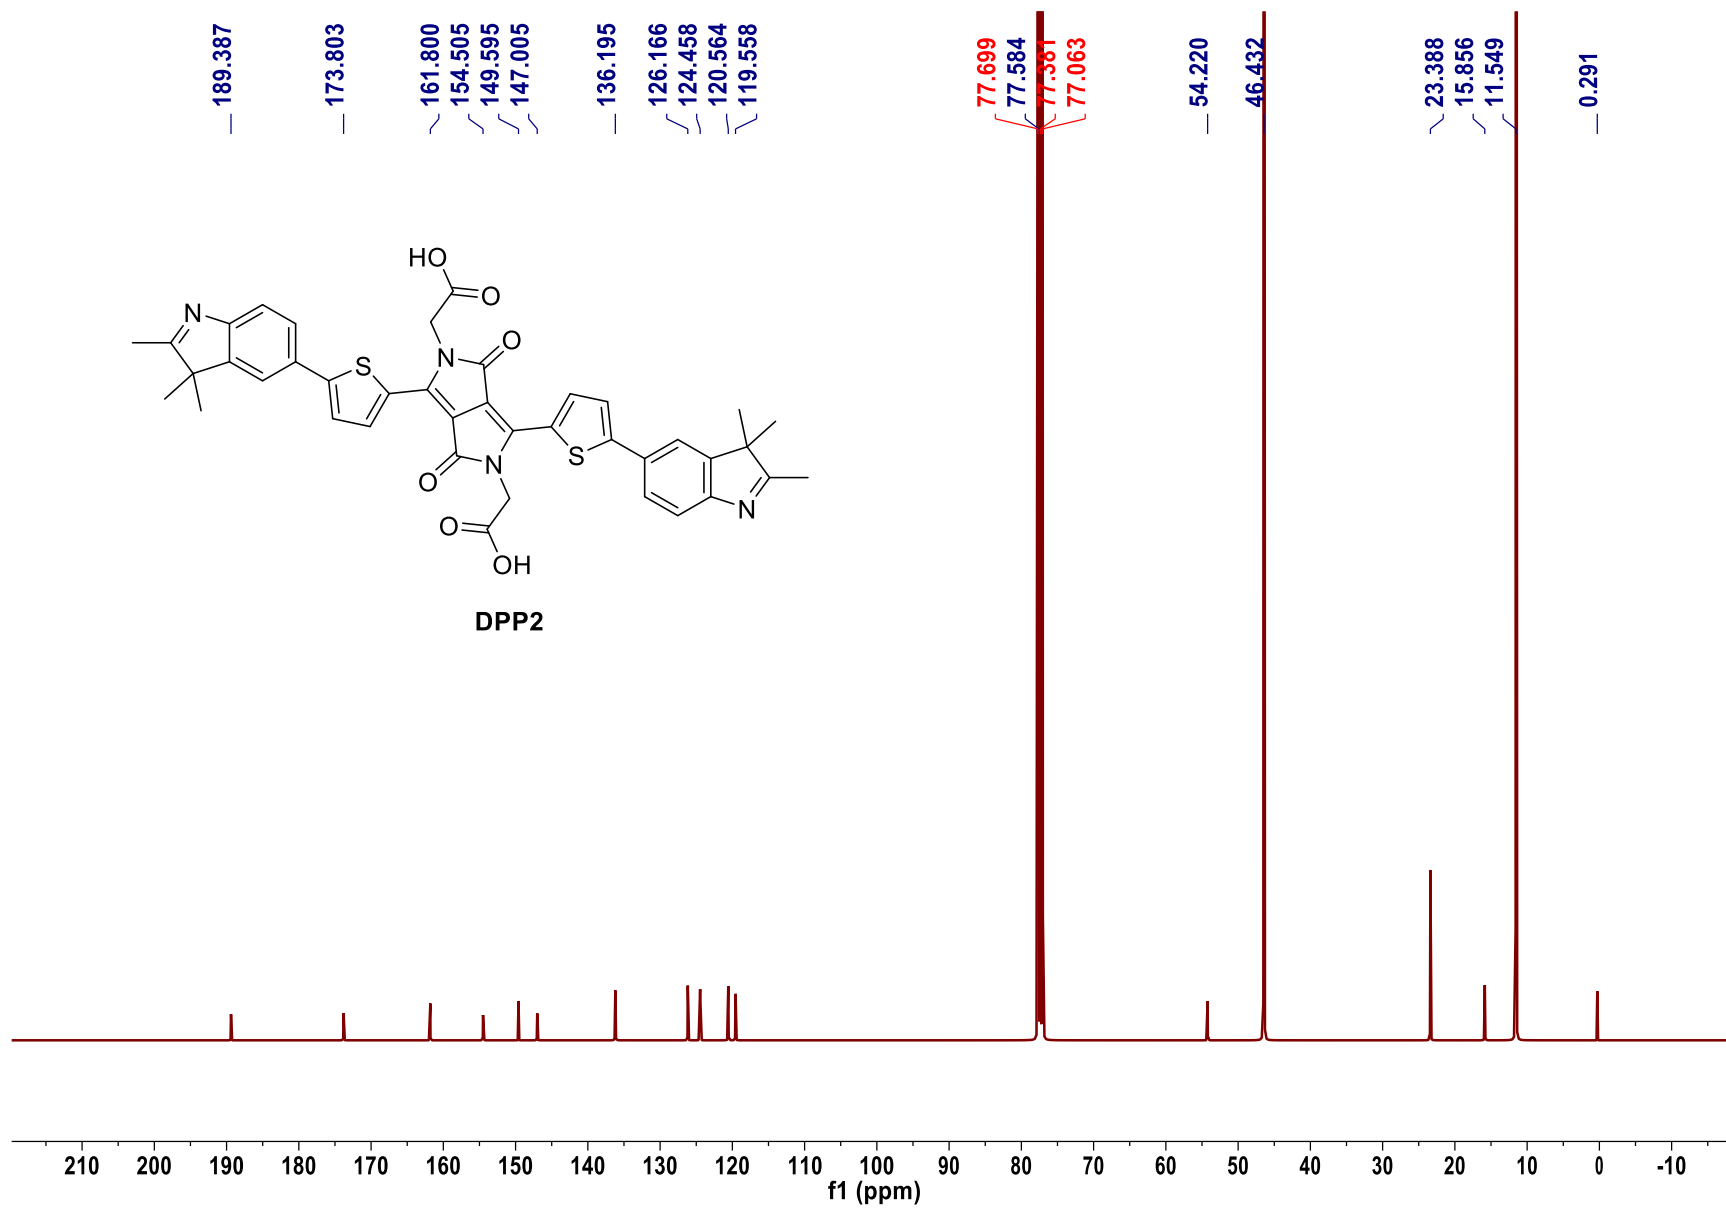

## Photophysical Characterization

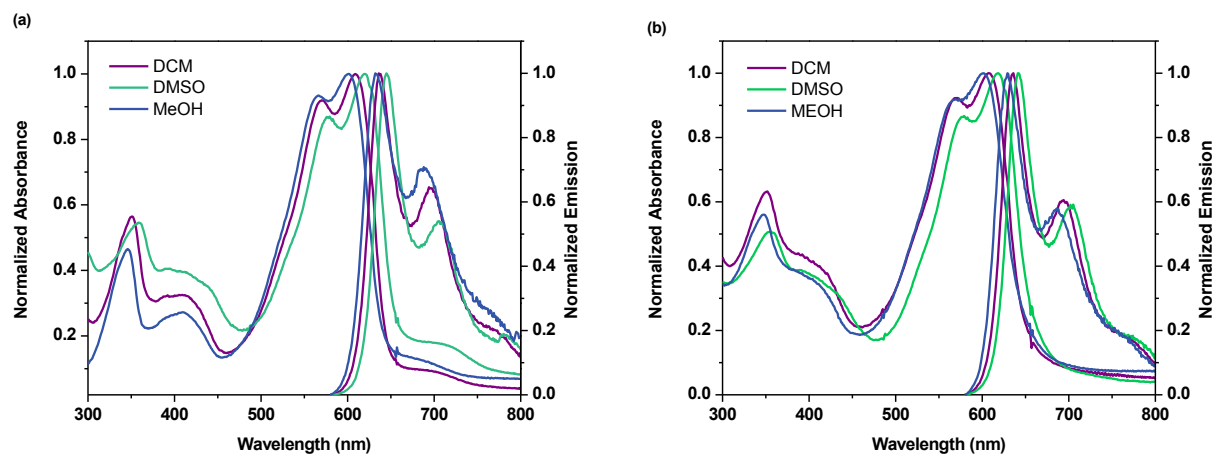

**Figure 1.** Normalized absorbance and fluorescence spectra of (a) **DPP1** and (b) **DPP2** in DCM, DMSO and MeOH in the presence of 1% Et<sub>3</sub>N.

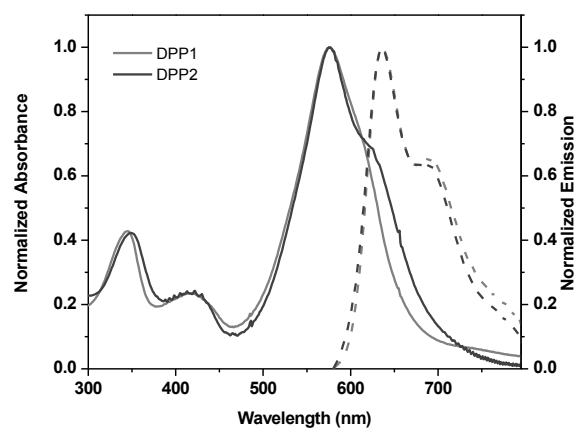

**Figure 2.** Normalized absorbance and fluorescence spectra of **DPP1** and **DPP2** in PBS.

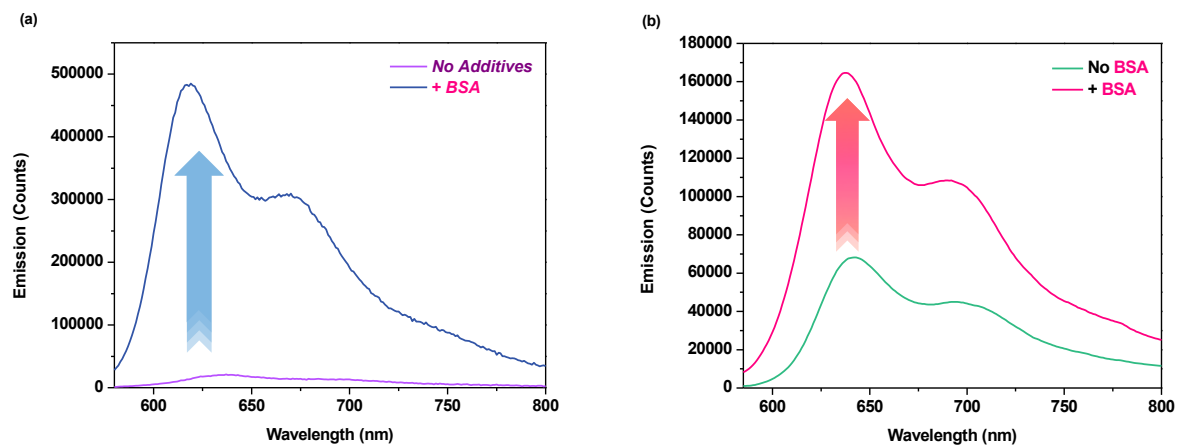

**Figure 3.** Effect of BSA addition on the emission spectra of (a) **DPP2** ( $\Phi_{fl} = 0.01$  before addition,  $\Phi_{fl} = 0.18$  after addition) and (b) **DPP1** in PBS ( $\Phi_{fl} = 0.02$  before addition,  $\Phi_{fl} = 0.07$  after addition).

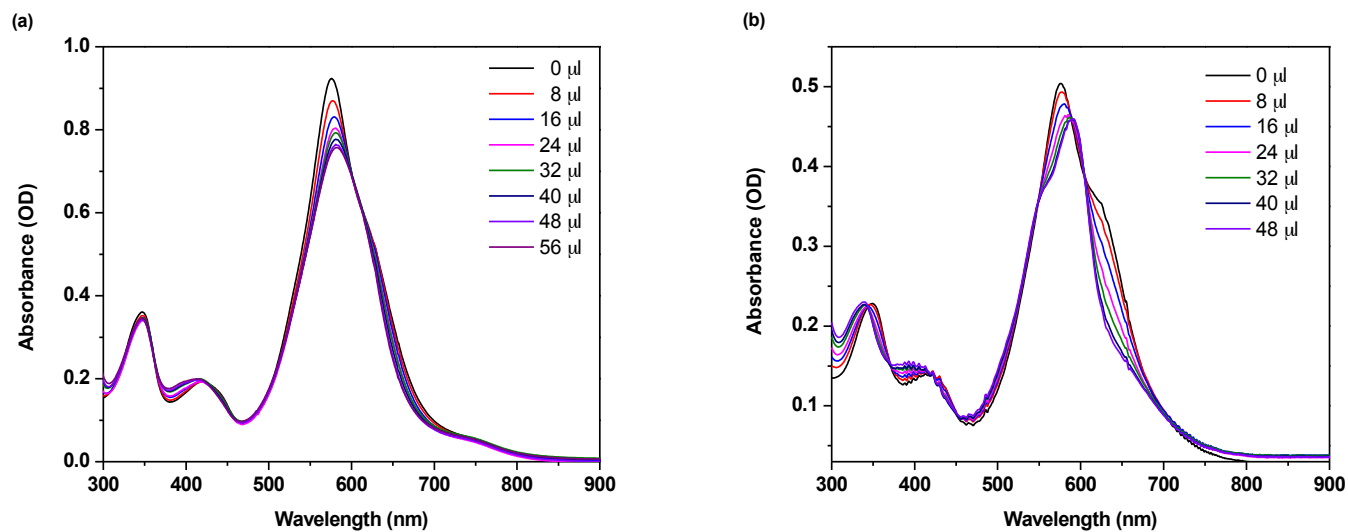

**Figure 4.** BSA ( $6 \times 10^{-4}$  M) titration to a solution of (a) **DPP1** and (b) **DPP2** in PBS.
